# Supplementary material for: Investigating the Role of an Inquiry-Based Biology Lab Course on Student Attitudes and Views toward Science
Source: Atypon-hosted journal article supplement (doi:10.1187/cbe.14-11-0203), 2016-11-18
Supplement: combinedsupmats.pdf [file combinedsupmats.pdf]

# Supplemental Material

*CBE—Life Sciences Education*

Jeffery *et al.*

## Supplemental Material

Figure S1. Scree plot used in factor analysis.

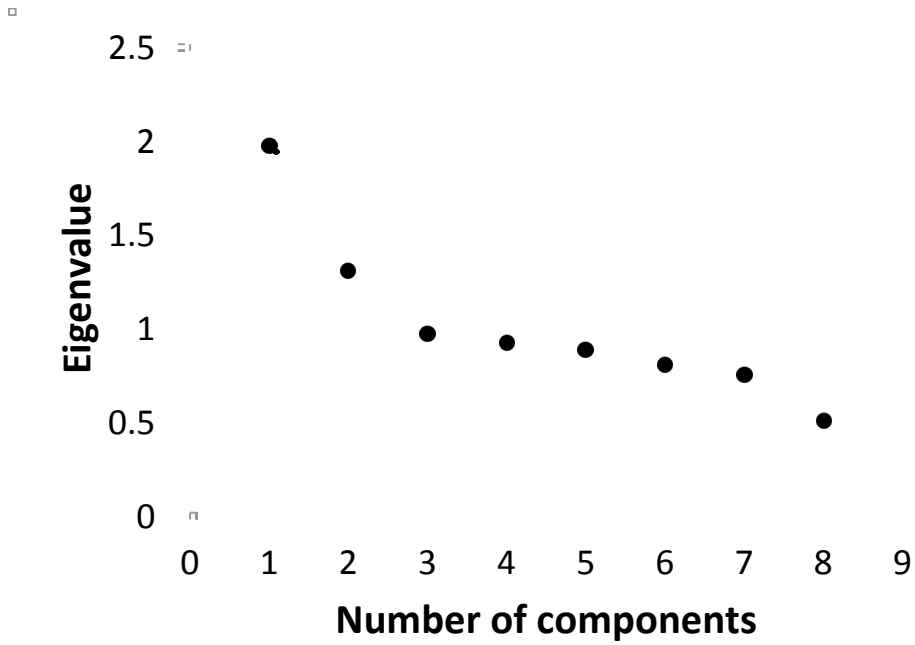

## Supplemental Material

**Table S1.** Development of survey items. Bolded text indicates text that was added and/or altered in revising the item; grayed-out text indicates text that was removed in subsequent versions of the item.

| Source survey (Citation)   | Item | Original item                                                                                                                              | Early version (used in 3 student interviews)                                                                                                         | Final version (used in 8 student interviews)                                                    |
|----------------------------|------|--------------------------------------------------------------------------------------------------------------------------------------------|------------------------------------------------------------------------------------------------------------------------------------------------------|-------------------------------------------------------------------------------------------------|
| SUSSI (Liang et al., 2008) | Q1   | Scientific theories based on accurate experimentation will not be changed/modified. (-)                                                    | <b>Biology knowledge gained through</b> accurate experimentation will <b>NOT</b> be changed. (-)                                                     | Biology knowledge gained through accurate experimentation will <b>NOT</b> be changed. (-)       |
|                            | Q5   | Scientists may make different interpretations based on the same observations. (+)                                                          | <b>Biologists</b> may make different interpretations based on the same observations. (+)                                                             | Biologists may make different interpretations based on the same observations. (+)               |
|                            | Q6   | Scientific research is not influenced by society and culture because scientists are trained to conduct <b>pure</b> , unbiased studies. (-) | <b>Biology research</b> is <b>NOT</b> influenced by society and culture because <b>biologists</b> are trained to conduct pure, unbiased studies. (-) | Biology research is influenced by <b>the researcher's culture and social background</b> . (+)   |
|                            | Q3   | Scientists do not use their imagination and creativity because they can interfere with objectivity. (-)                                    | <b>Biologists</b> do <b>NOT</b> use their <b>creative</b> imagination because <b>it</b> can interfere with <b>scientific reasoning</b> . (-)         | Biologists do NOT use their imagination because it can interfere with scientific reasoning. (-) |
|                            | Q8   | Scientists follow the same step-by-step scientific method. (-)                                                                             | <b>Biologists all</b> follow the same step-by-step <b>approach when designing experiments</b> . (-)                                                  | Biologists all follow the same step-by-step <b>scientific method</b> . (-)                      |
| (Liang et al., 2006)       | Q14  | The purpose of scientific research is to uncover truth or facts. (-)                                                                       | The <b>primary purpose of doing a biology experiment</b> is to <b>establish</b> facts. (-)                                                           | The primary purpose of doing a biology experiment is to establish facts. (-)                    |

|                                    |     |                                                                                                                   |                                                                                                                   |                                                                                                                   |
|------------------------------------|-----|-------------------------------------------------------------------------------------------------------------------|-------------------------------------------------------------------------------------------------------------------|-------------------------------------------------------------------------------------------------------------------|
| CLASS-Bio<br>(Semsar et al., 2011) | Q13 | Learning biology that is not directly relevant to or applicable to human health is not worth my time. (-)         | <b>The study of biology is only useful when it directly benefits humans.</b> (-)                                  | The study of biology is only useful when it directly benefits human <b>health or wellbeing.</b> (-)               |
|                                    | Q12 | I think about the biology I experience in everyday life. (+)                                                      | I think about the biology I experience in everyday life. (+)                                                      | I think about the biology I experience in everyday life. (+)                                                      |
| Created by authors                 | Q2  | Biologists should know when the answer to a biology problem is correct. (-)                                       | Biologists should know when the answer to a biology problem is correct. (-)                                       | Biologists <b>can NEVER be certain that the answer to a biology research question</b> is correct. (+)             |
|                                    | Q4  | If the same biology experiment is done more than once, the data that are collected should always be the same. (-) | If the same biology experiment is done more than once, the data that are collected should always be the same. (-) | If the same biology experiment is done more than once, the data that are collected should always be the same. (-) |
|                                    | Q7  | The more hypotheses an experiment attempts to test, the better. (-)                                               | The more hypotheses an experiment attempts to test, the better. (-)                                               | The more hypotheses an experiment attempts to test, the better. (-)                                               |
|                                    | Q11 | If I had the necessary materials, I could conduct a successful biology experiment. (+)                            | If I had the necessary materials, I could conduct a successful biology experiment. (+)                            | If I had the necessary materials, I could conduct a successful biology experiment. (+)                            |
|                                    | Q10 | I am confident that I can design a valid biology experiment. (+)                                                  | I am confident that I can design a valid biology experiment. (+)                                                  | I am confident that I can design a valid biology experiment. (+)                                                  |
|                                    | Q9  | Experiments that are done under lab conditions can provide information that applies to the real world. (+)        | Experiments that are done under lab conditions can provide information that applies to the real world. (+)        | Experiments that are done under lab conditions can provide information that applies to the real world. (+)        |

---

**Table S2.** Final set of eight survey items. Groupings are based on exploratory factor analysis of students' post-test responses.

---

Attitudinal Survey Item (expert-like response: agree + or disagree -)

---

Confidence & interest in scientific inquiry:

If I had the necessary materials, I could conduct a successful biology experiment. (+)

I am confident that I can design a valid biology experiment. (+)

I think about the biology I experience in everyday life. (+)

Understanding & acceptance of scientific inquiry:

The study of biology is only useful when it directly benefits human health or wellbeing. (-)

Biologists may make different interpretations based on the same observations. (+)

Biologists do NOT use their imagination because it can interfere with scientific reasoning. (-)

Experiments that are done under lab conditions can provide information that applies to the real world. (+)

The more hypotheses an experiment attempts to test, the better. (-)

---
